# Supplementary material
Source: PubMed Central journal article supplement (PMC7608959)
Supplement: ASN.2020030290SupplementaryData1.pdf [file ASN.2020030290SupplementaryData1.pdf]

## Supplemental Material

### Table of Contents:

**Supplemental Appendix 1.** Methodology for estimating the number of healthy and less-healthy food outlets within patient residential zip code and dialysis unit neighborhood

**Supplemental Appendix 2.** Components of the AHRQ SES Index

**Supplemental Figure 1.** Geographic distribution of dialysis units included in the final cohort

**Supplemental Figure 2.** The proportion of patients with serum phosphorus  $> 5.5\text{mg/dL}$  or  $>6.5\text{mg/dL}$  is greater among patients who are younger

**Supplemental Figure 3.** Correlation between AHRQ SES Index from US Census data from 2000 and SES Index calculated using US Census data from 2007-2011.

**Supplemental Table 1.** Availability of healthy and less-healthy food outlets in the neighborhood of the dialysis unit

**Supplemental Table 2.** Correlation between zip code socioeconomic status for dialysis unit and patient home location

**Supplemental Table 3.** Individual components of the mixed effects linear model demonstrating the relationship between availability of healthy food outlets and serum phosphorus levels

**Supplemental Table 4.** Individual components of the mixed effects linear model examining the relationship between neighborhood socioeconomic status index and serum phosphorus levels

**Supplemental Table 5.** Mixed effects linear model examining the relationship between availability of healthy food outlets within 0.6 miles (1-kilometer) of a dialysis unit on serum phosphorus level

**Supplemental Table 6.** Mixed effects linear model examining the relationship between availability of less-healthy food within 0.6 miles (1-kilometer) of a dialysis unit on serum phosphorus level

**Supplemental Appendix 1.** Methodology for estimating the number of healthy and less-healthy food outlets within patient residential zip code and dialysis unit neighborhood

We identified food outlets as healthy or less-healthy using classification described in the modified retail food environment index (mRFEI) published by the Centers for Disease Control.

Healthy food outlets were identified by the following NAICS codes (North American Industry Classification System): 445110 (supermarkets and larger grocery stores), 445230 (fruit and vegetable markets), and 452910 (warehouse clubs).

Less-healthy food outlets were identified by the following NAICS codes: 722211 (fast food restaurants), 445120 (convenience stores), and 445110 (small groceries – less than 3 or fewer employees).

*Estimation of Food environment in the residential zip code:*

Using data from the United States County Business Patterns dataset between the years 2007 and 2011, we extracted information on retail food outlets (<https://www.census.gov/content/census/en/programs-surveys/cbp/data/datasets.html/>). We then identified NAICS codes which corresponded to healthy and less-healthy food outlets within each zip code. Finally, we obtained the mean number of healthy and less-healthy food outlets within each zip code between 2007 and 2011.

*Estimation of Food environment in the neighborhood of the dialysis unit:*

We first geocoded the location of every dialysis unit in our dataset using R package “ggmap.” We then used Esri Business Locations and Business Summary Data file 2016 to obtain the geographic coordinates for retail business in the United States. The retail businesses were restricted to healthy and less-healthy food outlets using NAICS codes described above. We then built drive time service areas around dialysis units using the Network Analyst extension in ArcGIS Desktop 10.6.1 in the following order: 1) Driving distance of 1000 meters (1 kilometer) around each dialysis unit, 2) distance covered by a driving time of 10 minutes from each dialysis unit, and 3) distance covered by a driving time of 15 minutes from each dialysis unit. Finally, we calculated the number of healthy and less healthy food outlets that would be located within each geographic boundary.

## Supplemental Appendix 2. Components of the AHRQ SES Index

| Variable    | Definition                                                                                                     |
|-------------|----------------------------------------------------------------------------------------------------------------|
| crowded     | Percentage of households containing one or more person per room                                                |
| Prop100     | Median value of owner-occupied values standardized to range from 0 to 100                                      |
| Pct_poverty | Percentage of persons below the federally defined poverty line                                                 |
| Hhinc100    | Median household income standardized to range from 0 to 100                                                    |
| High_educ   | Percentage of persons aged $\geq 25$ years with at least 4 years of college                                    |
| Low_educ    | Percentage of persons aged $\geq 25$ years with less than a 12 <sup>th</sup> -grade education                  |
| Pct_unemp   | Percentage of persons aged 16 years or older in the labor force who are unemployed (and actively seeking work) |

Final formula for calculation of SES Index Score:

$$\text{SES Index Score} = 50 + (-0.07 * \text{crowded}) + (0.08 * \text{prop100}) + (-0.10 * \text{pct\_poverty}) + (0.11 * \text{hhinc100}) + (0.10 * \text{high\_educ}) + (-0.11 * \text{low\_educ}).$$

AHRQ: Agency for Healthcare Related Quality; SES: Socio-economic status

**Supplemental Figure 1.** Geographic distribution of dialysis units included in the final cohort

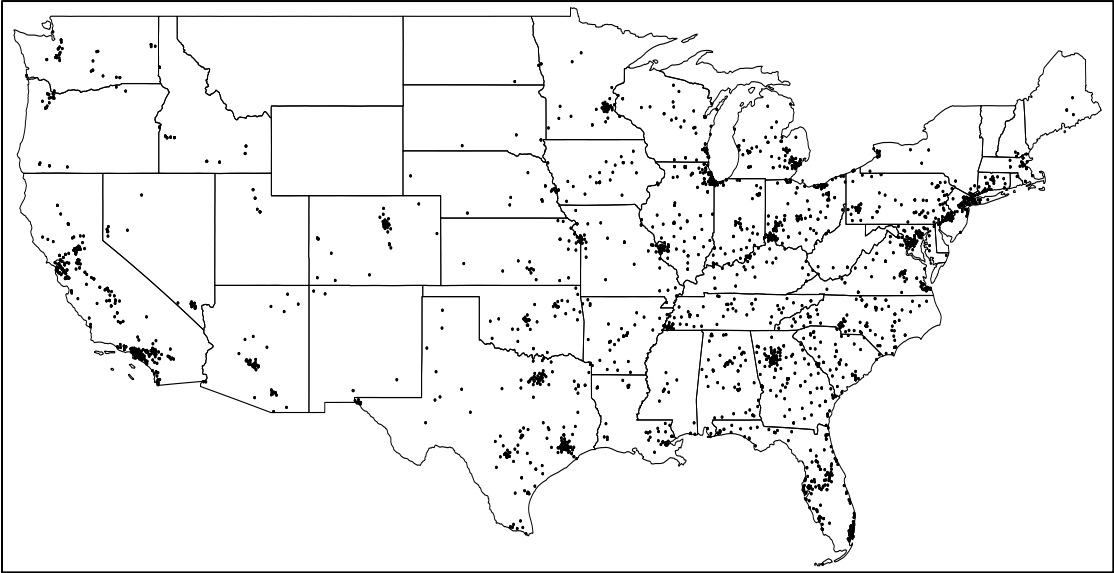

**Supplemental Figure 2.** Proportion of patients with a serum phosphorus greater than 5.5mg/dL or 6.5mg/dL is higher among patients who are younger

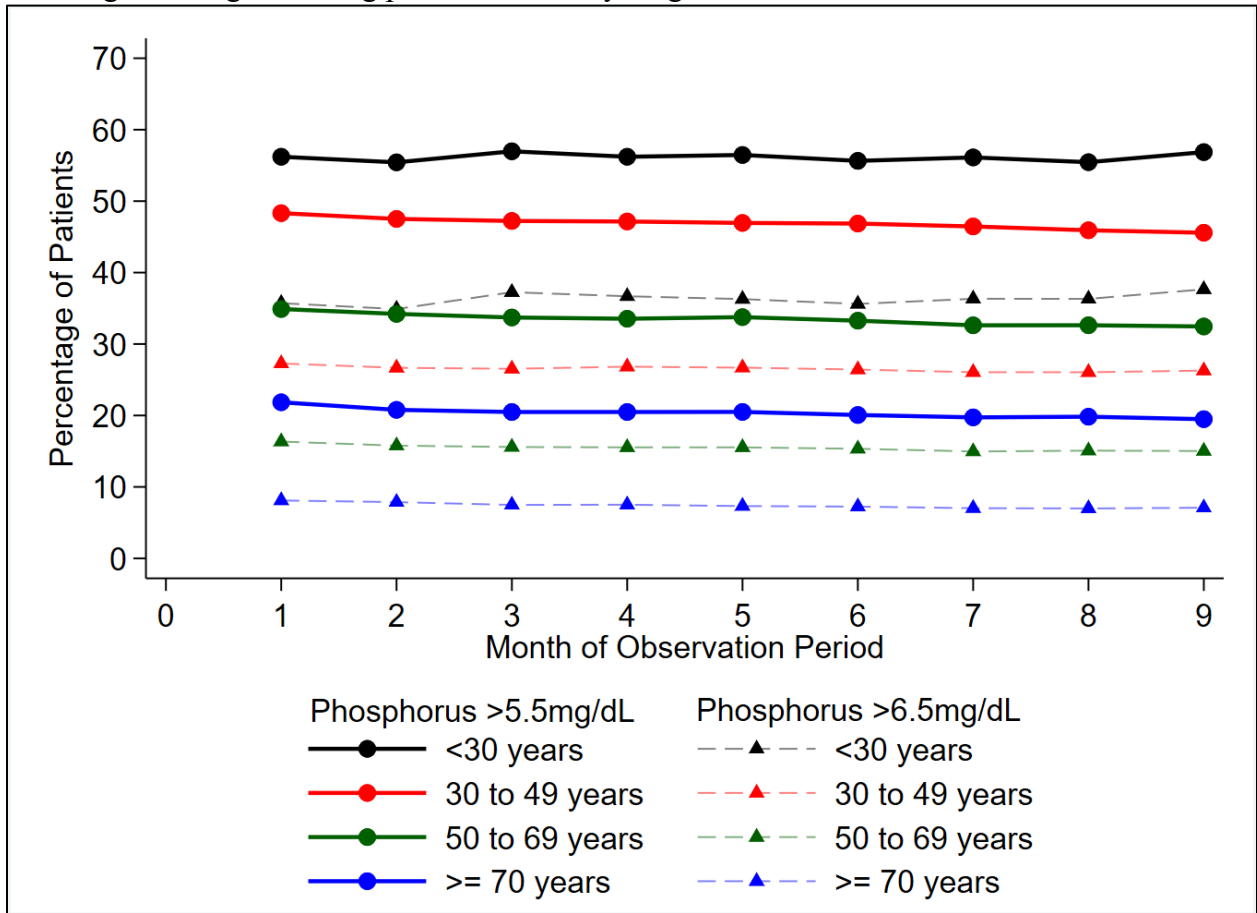

**Supplemental Figure 3.** Correlation between AHRQ SES Index from US census data from year 2000 and SES Index calculated using US American Community Survey census data from years 2007-2011

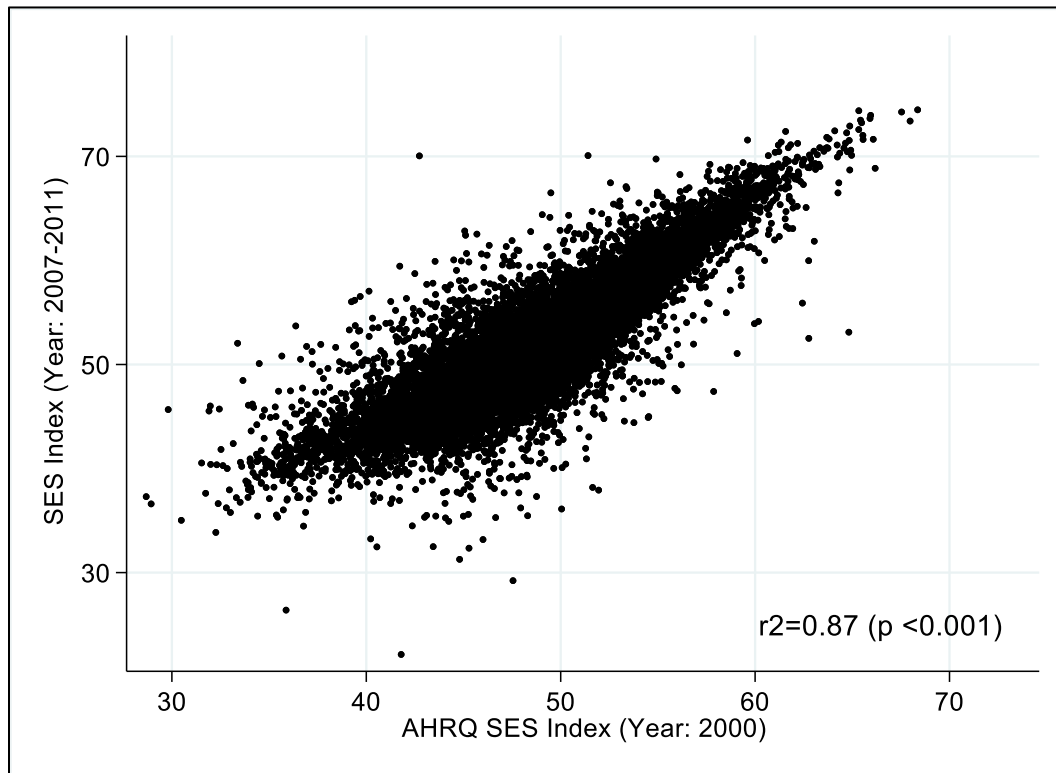

AHRQ: Agency for Healthcare Research and Quality; SES: Socioeconomic status

**Supplemental Table 1.** Availability of healthy and less-healthy food outlets in the neighborhood of the dialysis unit

|                                             | Socioeconomic Status Index Quartile |              |              |                | All          | p-value |
|---------------------------------------------|-------------------------------------|--------------|--------------|----------------|--------------|---------|
|                                             | Lowest                              | Medium Low   | Medium High  | Highest        |              |         |
| Number of Dialysis Units                    | 667                                 | 485          | 444          | 562            | 2158         | n/a     |
| Access to Food Outlets Near Dialysis Units  |                                     |              |              |                |              |         |
| Healthy within 1km (median, (IQR))          | 1 (0, 2)                            | 0 (0, 1)     | 0 (0, 1)     | 1 (0, 1)       | 0 (0, 1)     | <0.001  |
| Less-healthy within 1km (median, (IQR))     | 1 (0, 3)                            | 1 (0, 2)     | 1 (0, 2)     | 1 (0, 2)       | 1 (0, 2)     | <0.001  |
| Healthy within 10 min (median, (IQR))*      | 17 (6, 34)                          | 12 (5, 21)   | 12 (6, 20)   | 18 (11, 26)    | 15 (7, 26)   | <0.001  |
| Less-healthy within 10 min (median, (IQR))* | 41.5 (15, 82)                       | 24 (10, 54)  | 26 (12, 50)  | 36 (21, 57)    | 32 (14, 61)  | <0.001  |
| Healthy within 15 min (median, (IQR))*      | 38 (10, 87)                         | 21 (7, 52)   | 24 (10, 48)  | 42 (24.5, 66)  | 32 (12, 63)  | <0.001  |
| Less-healthy within 15 min (median, (IQR))* | 97.5 (23, 212)                      | 44 (15, 127) | 50 (20, 120) | 88.5 (42, 147) | 69 (24, 151) | <0.001  |

\*Geographic boundary was estimated using driving time around each dialysis unit  
 IQR: Interquartile range

**Supplemental Table 2.** Correlation between zip code socioeconomic status for dialysis unit and patient home location

|                                   | <b>Dialysis Unit Zip code SES Index</b> |               |                   |                    |               |
|-----------------------------------|-----------------------------------------|---------------|-------------------|--------------------|---------------|
|                                   | <b>Total</b>                            | <b>Low</b>    | <b>Medium Low</b> | <b>Medium High</b> | <b>High</b>   |
| <b>Patient Zip code SES Index</b> |                                         |               |                   |                    |               |
| Lowest Quartile                   | 82,847                                  | <b>48,306</b> | 14,050            | 9,202              | 11,289        |
| (%)                               | 100                                     | <b>58.31</b>  | 16.96             | 11.11              | 13.63         |
| Medium Low                        | 52,155                                  | 9,076         | <b>23,747</b>     | 9,840              | 9,492         |
| (%)                               | 100                                     | 17.4          | <b>45.53</b>      | 18.87              | 18.2          |
| Medium High                       | 48,771                                  | 6,307         | 7,233             | <b>22,179</b>      | 13,052        |
| (%)                               | 100                                     | 12.93         | 14.83             | <b>45.48</b>       | 26.76         |
| Highest Quartile                  | 67,452                                  | 6,302         | 6,575             | 11,077             | <b>43,498</b> |
| (%)                               | 100                                     | 9.34          | 9.75              | 16.42              | <b>64.49</b>  |
| Total                             | 251,225                                 | 69,991        | 51,605            | 52,298             | 77,331        |
| (%)                               | 100                                     | 27.86         | 20.54             | 20.82              | 30.78         |

SES: Socioeconomic stats



**Supplemental Table 3.** Individual components of the mixed effects linear model demonstrating the relationship between availability of healthy food outlets and serum phosphorus levels

| Variable                 | Base Model | Base Model + | Base Model + | Base Model + | Base Model +           |
|--------------------------|------------|--------------|--------------|--------------|------------------------|
|                          |            | Month +      | Month +      | Month +      | Month +                |
|                          |            |              | SES Index +  | SES Index +  | SES Index +            |
|                          |            |              |              | Demographics | Demographics +         |
|                          |            |              |              |              | Time updated variables |
| <b>Month on Dialysis</b> |            |              |              |              |                        |
| 1st                      |            | Ref          | Ref          | Ref          | Ref                    |
| 2nd                      |            | -0.02498948  | -0.0255204   | -0.02719422  | -0.02838339            |
| (SE)                     |            | 0.0031233    | 0.00315279   | 0.00326138   | 0.00327236             |
| (p-value)                |            | 0            | 0            | 0            | 0                      |
| 3rd                      |            | -0.03505819  | -0.03547476  | -0.03943846  | -0.04057377            |
| (SE)                     |            | 0.0031713    | 0.00320118   | 0.0033093    | 0.00332729             |
| (p-value)                |            | 0            | 0            | 0            | 0                      |
| 4th                      |            | -0.03979909  | -0.03940712  | -0.04310662  | -0.04476543            |
| (SE)                     |            | 0.00321478   | 0.00324515   | 0.00335372   | 0.00337726             |
| (p-value)                |            | 0            | 0            | 0            | 0                      |
| 5th                      |            | -0.04212536  | -0.04276891  | -0.04698347  | -0.04875381            |
| (SE)                     |            | 0.00325475   | 0.00328548   | 0.00339468   | 0.00342473             |
| (p-value)                |            | 0            | 0            | 0            | 0                      |
| 6th                      |            | -0.0587392   | -0.05868269  | -0.06370848  | -0.06550525            |
| (SE)                     |            | 0.00329646   | 0.00332764   | 0.00343805   | 0.0034754              |
| (p-value)                |            | 0            | 0            | 0            | 0                      |
| 7th                      |            | -0.07578109  | -0.07615327  | -0.08302452  | -0.08491457            |
| (SE)                     |            | 0.00333737   | 0.003369     | 0.00348092   | 0.00352601             |
| (p-value)                |            | 0            | 0            | 0            | 0                      |
| 8th                      |            | -0.07613521  | -0.07621489  | -0.08368326  | -0.08564235            |
| (SE)                     |            | 0.00337629   | 0.00340819   | 0.00352148   | 0.00357271             |
| (p-value)                |            | 0            | 0            | 0            | 0                      |
| 9th                      |            | -0.08260489  | -0.0832526   | -0.09106041  | -0.09324126            |
| (SE)                     |            | 0.00341571   | 0.00344767   | 0.0035624    | 0.00361787             |
| (p-value)                |            | 0            | 0            | 0            | 0                      |
|                          |            |              |              |              |                        |
| <b>SES Index</b>         |            |              |              |              |                        |
| Lowest Quartile          |            |              | Ref          | Ref          | Ref                    |
| Medium Low               |            |              | 0.0013016    | 0.010332     | 0.01019952             |
| (SE)                     |            |              | 0.00808514   | 0.00783319   | 0.00783779             |
| (p-value)                |            |              | 0.8721       | 0.1872       | 0.1931                 |

|                               |  |  |             |             |             |
|-------------------------------|--|--|-------------|-------------|-------------|
| Medium High                   |  |  | -0.03241927 | -0.00103144 | -0.00154273 |
| (SE)                          |  |  | 0.00824529  | 0.00805305  | 0.00805848  |
| (p-value)                     |  |  | 0.0001      | 0.8981      | 0.8482      |
| Highest Quartile              |  |  | -0.06293372 | 0.01684644  | 0.01484387  |
| (SE)                          |  |  | 0.00774875  | 0.00773305  | 0.00773949  |
| (p-value)                     |  |  | 0           | 0.0294      | 0.0551      |
|                               |  |  |             |             |             |
| <b>Patient Age (years)</b>    |  |  |             | -0.0275492  | -0.02758053 |
| (SE)                          |  |  |             | 0.00016848  | 0.00017008  |
| (p-value)                     |  |  |             | 0           | 0           |
|                               |  |  |             |             |             |
| <b>Sex (Female)</b>           |  |  |             | -0.01336045 | -0.01046363 |
| (SE)                          |  |  |             | 0.00487114  | 0.0049089   |
| (p-value)                     |  |  |             | 0.0061      | 0.033       |
|                               |  |  |             |             |             |
| <b>Race/Ethnicity (White)</b> |  |  |             | Ref         | Ref         |
| Black                         |  |  |             | -0.21784389 | -0.21705395 |
| (SE)                          |  |  |             | 0.00646921  | 0.006484    |
| (p-value)                     |  |  |             | 0           | 0           |
| Hispanic                      |  |  |             | -0.08230184 | -0.08558283 |
| (SE)                          |  |  |             | 0.00807098  | 0.0080728   |
| (p-value)                     |  |  |             | 0           | 0           |
|                               |  |  |             |             |             |
| <b>Cause of ESRD</b>          |  |  |             |             |             |
| Glomerulonephritis            |  |  |             | Ref         | Ref         |
| Diabetes                      |  |  |             | 0.09238472  | 0.09238994  |
| (SE)                          |  |  |             | 0.00871269  | 0.00872227  |
| (p-value)                     |  |  |             | 0           | 0           |
| Hypertension                  |  |  |             | 0.08550395  | 0.08550118  |
| (SE)                          |  |  |             | 0.00920813  | 0.00921452  |
| (p-value)                     |  |  |             | 0           | 0           |
| Cystic Disease                |  |  |             | 0.14206395  | 0.1371193   |
| (SE)                          |  |  |             | 0.01900603  | 0.01901992  |
| (p-value)                     |  |  |             | 0           | 0           |
| Other                         |  |  |             | 0.00371288  | 0.00581287  |
| (SE)                          |  |  |             | 0.01100277  | 0.01101629  |
| (p-value)                     |  |  |             | 0.7358      | 0.5977      |
|                               |  |  |             |             |             |

|                                             |           |           |           |           |             |
|---------------------------------------------|-----------|-----------|-----------|-----------|-------------|
| <b>Treatments missed (per month)</b>        |           |           |           |           |             |
| Less than 2                                 |           |           |           |           | Ref         |
| 2 to 3                                      |           |           |           |           | -0.04299928 |
| (SE)                                        |           |           |           |           | 0.00252063  |
| (p-value)                                   |           |           |           |           | 0           |
| 4 or more                                   |           |           |           |           | -0.09653973 |
| (SE)                                        |           |           |           |           | 0.00327731  |
| (p-value)                                   |           |           |           |           | 0           |
| <b>Types of binders</b>                     |           |           |           |           |             |
| None                                        |           |           |           |           | Ref         |
| One                                         |           |           |           |           | 0.0340024   |
| (SE)                                        |           |           |           |           | 0.0031265   |
| (p-value)                                   |           |           |           |           | 0           |
| Two or more                                 |           |           |           |           | 0.02090001  |
| (SE)                                        |           |           |           |           | 0.00501036  |
| (p-value)                                   |           |           |           |           | 0           |
| <b>Average time on dialysis (per month)</b> |           |           |           |           |             |
| < = 3hrs                                    |           |           |           |           | Ref         |
| 3 to 3hr 30min                              |           |           |           |           | 0.00375084  |
| (SE)                                        |           |           |           |           | 0.00643157  |
| (p-value)                                   |           |           |           |           | 0.5598      |
| 3 hr 30 min to 3hr 45                       |           |           |           |           | -0.02688566 |
| (SE)                                        |           |           |           |           | 0.00773732  |
| (p-value)                                   |           |           |           |           | 0.0005      |
| 3hr 45 min to 4 hrs                         |           |           |           |           | 0.03368687  |
| (SE)                                        |           |           |           |           | 0.00870322  |
| (p-value)                                   |           |           |           |           | 0.0001      |
| > 4hrs                                      |           |           |           |           | -0.00450615 |
| (SE)                                        |           |           |           |           | 0.00857769  |
| (p-value)                                   |           |           |           |           | 0.5994      |
| <b>Model fit statistics</b>                 |           |           |           |           |             |
| AIC                                         | 5097884.5 | 5096878.4 | 5006405.6 | 4547878.7 | 4523312.7   |
| BIC                                         | 5097970.6 | 5097062.9 | 5006626.8 | 4548195.9 | 4523727.4   |

**Supplemental Table 4.** Individual components of the mixed effects linear model examining the relationship between neighborhood socioeconomic status index and serum phosphorus levels

| <b>Variable</b>                             | <b>Base Model</b> | <b>Base Model +<br/>Month</b> | <b>Base Model +<br/>Month +<br/>Demographics</b> | <b>Base Model +<br/>Month +<br/>Demographics +<br/>Time updated<br/>variables</b> |
|---------------------------------------------|-------------------|-------------------------------|--------------------------------------------------|-----------------------------------------------------------------------------------|
| <b>Month on Dialysis</b>                    |                   |                               |                                                  |                                                                                   |
| 1st Month                                   |                   | Ref                           | Ref                                              | Ref                                                                               |
| 2 <sup>nd</sup>                             |                   | -.02551857***                 | -.02719381***                                    | -.02838266***                                                                     |
| 3 <sup>rd</sup>                             |                   | -.03547308***                 | -.0394378***                                     | -.04057262***                                                                     |
| 4 <sup>th</sup>                             |                   | -.03940416***                 | -.04310576***                                    | -.04476387***                                                                     |
| 5 <sup>th</sup>                             |                   | -.04276538***                 | -.04698252***                                    | -.04875208***                                                                     |
| 6 <sup>th</sup>                             |                   | -.05867767***                 | -.06370749***                                    | -.06550334***                                                                     |
| 7 <sup>th</sup>                             |                   | -.07614822***                 | -.08302352***                                    | -.08491256***                                                                     |
| 8 <sup>th</sup>                             |                   | -.07620902***                 | -.08368223***                                    | -.0856402***                                                                      |
| 9 <sup>th</sup>                             |                   | -.08324641***                 | -.09105928***                                    | -.09323895***                                                                     |
| <b>Patient Age in Years</b>                 |                   |                               | -.02754958***                                    | -.02758107***                                                                     |
| <b>Sex Female</b>                           |                   |                               | -.0133321**                                      | -.01043706*                                                                       |
|                                             |                   |                               |                                                  |                                                                                   |
| <b>Race (White)</b>                         |                   |                               | Ref                                              | Ref                                                                               |
| Black                                       |                   |                               | -.21764053***                                    | -.21685135***                                                                     |
| Hispanic                                    |                   |                               | -.08207742***                                    | -.08535633***                                                                     |
| <b>Cause of ESRD</b>                        |                   |                               |                                                  |                                                                                   |
| Glomerulonephritis                          |                   |                               | Ref                                              | Ref                                                                               |
| Diabetes                                    |                   |                               | .0924107***                                      | .09241313***                                                                      |
| Hypertension                                |                   |                               | .08556085***                                     | .08555246***                                                                      |
| PKD/CAKUT                                   |                   |                               | .14203708***                                     | .13708397***                                                                      |
| Other                                       |                   |                               | 0.0037326                                        | 0.00582409                                                                        |
| <b>Missed Treatments</b>                    |                   |                               |                                                  |                                                                                   |
| Less than 2                                 |                   |                               |                                                  | Ref                                                                               |
| 2 to 3                                      |                   |                               |                                                  | -.04299993***                                                                     |
| >= 4                                        |                   |                               |                                                  | -.0965391***                                                                      |
| <b>Phosphate Binders</b>                    |                   |                               |                                                  |                                                                                   |
| None                                        |                   |                               |                                                  | Ref                                                                               |
| One                                         |                   |                               |                                                  | .03399696***                                                                      |
| Two or more                                 |                   |                               |                                                  | .0208914***                                                                       |
| <b>Average time on dialysis (per month)</b> |                   |                               |                                                  |                                                                                   |
| <= 3hrs                                     |                   |                               |                                                  | Ref                                                                               |
| 3 to 3hr 30min                              |                   |                               |                                                  | 0.00374759                                                                        |

|                             |           |           |           |               |
|-----------------------------|-----------|-----------|-----------|---------------|
| 3hr 30min to 3hr 45min      |           |           |           | -.02690897*** |
| 3hr 45min to 4hrs           |           |           |           | .03366741***  |
| >= 4hrs                     |           |           |           | -0.00453741   |
| <b>Model fit statistics</b> |           |           |           |               |
| AIC                         | 5007400.5 | 5006408.3 | 4547873.1 | 4523307       |
| BIC                         | 5007486.5 | 5006592.6 | 4548153.7 | 4523685.1     |

\*p-value <0.05, \*\* p-value <0.01, \*\*\* p-value <0.001

**Supplemental Table 5.** Mixed effects linear model examining the relationship between availability of healthy food outlets within 0.6 miles (1-kilometer) of a dialysis unit on serum phosphorus level

| Variable                          | Base Model | Base Model +  | Base Model +  | Base Model +   | Base Model +           |
|-----------------------------------|------------|---------------|---------------|----------------|------------------------|
|                                   |            | Month         | Month +       | Month +        | Month +                |
|                                   |            |               | SES Index     | SES Index +    | SES Index +            |
|                                   |            |               |               | Demographics + | Demographics +         |
|                                   |            |               |               |                | Time updated variables |
| <b>Healthy Food Outlets</b>       |            |               |               |                |                        |
| 0                                 | Ref        | Ref           | Ref           | Ref            | Ref                    |
| 1                                 | -0.0193343 | -0.01941911   | -0.02291469   | -0.01439326    | -0.01548812            |
| >=2                               | 0.02066761 | 0.02105125    | 0.01743946    | 0.01384047     | 0.01322588             |
| <b>Dialysis Month (1st)</b>       |            | Ref           | Ref           | Ref            | Ref                    |
| 2nd                               |            | -.02502844*** | -.02560794*** | -.02731356***  | -.02858803***          |
| 3rd                               |            | -.03448579*** | -.0349915***  | -.03855586***  | -.03988009***          |
| 4th                               |            | -.0395688***  | -.03914714*** | -.04233871***  | -.04416002***          |
| 5th                               |            | -.04208611*** | -.04282247*** | -.04683518***  | -.04877479***          |
| 6th                               |            | -.05894516*** | -.05897273*** | -.06374671***  | -.06572291***          |
| 7th                               |            | -.07590521*** | -.07633124*** | -.08302341***  | -.08509092***          |
| 8th                               |            | -.0756284***  | -.07572451*** | -.08321715***  | -.08534253***          |
| 9th                               |            | -.08214508*** | -.0827659***  | -.09032044***  | -.09263363***          |
| <b>SES Index Quartile</b>         |            |               |               |                |                        |
| Lowest                            |            |               | Ref           | Ref            | Ref                    |
| Medium Low                        |            |               | 0.00377894    | 0.01125309     | 0.01109567             |
| Medium High                       |            |               | -.03280737*** | -0.00071872    | -0.00133583            |
| Highest                           |            |               | -.06206081*** | .01896177*     | .01708503*             |
| <b>Patient Age in Years</b>       |            |               |               | -.02758159***  | -.02761683***          |
| <b>Sex Female</b>                 |            |               |               | -.01463395**   | -.01166064*            |
|                                   |            |               |               |                |                        |
| <b>Race (White)</b>               |            |               |               | Ref            | Ref                    |
| Black                             |            |               |               | -.21830686***  | -.21767056***          |
| Hispanic                          |            |               |               | -.0824861***   | -.08581807***          |
| <b>Cause of ESRD</b>              |            |               |               |                |                        |
| Glomerulonephritis                |            |               |               | Ref            | Ref                    |
| Diabetes                          |            |               |               | .09237407***   | .09222784***           |
| Hypertension                      |            |               |               | .08542015***   | .08527721***           |
| PKD/CAKUT                         |            |               |               | .14181927***   | .13716437***           |
| Other                             |            |               |               | 0.00300943     | 0.00495868             |
| <b>Missed Dialysis Treatments</b> |            |               |               |                |                        |
| Less than 2                       |            |               |               |                | Ref                    |

|                                 |           |           |           |           |               |
|---------------------------------|-----------|-----------|-----------|-----------|---------------|
| 2 to 3                          |           |           |           |           | -.04283513*** |
| >= 4                            |           |           |           |           | -.09701748*** |
| <b>Phosphate Binders</b>        |           |           |           |           |               |
| None                            |           |           |           |           | Ref           |
| One                             |           |           |           |           | .03439161***  |
| Two                             |           |           |           |           | .02025365***  |
| <b>Average Time on Dialysis</b> |           |           |           |           |               |
| <= 3hrs                         |           |           |           |           |               |
| 3 to 3hr 30min                  |           |           |           |           | 0.00395894    |
| 3hr 30min to 3hr 45min          |           |           |           |           | -.02721621*** |
| 3hr 45min to 4hrs               |           |           |           |           | .03412625***  |
| >= 4hrs                         |           |           |           |           | -0.00388774   |
| <b>Model fit statistics</b>     |           |           |           |           |               |
| AIC                             | 5015316.3 | 5014331.1 | 4925078   | 4476649.9 | 4453454.9     |
| BIC                             | 5015390   | 5014503.1 | 4925286.6 | 4476954.5 | 4453856.8     |

\*p-value <0.05, \*\* p-value <0.01, \*\*\* p-value <0.001

**Supplemental Table 6** Mixed effects linear model examining the relationship between availability of less-healthy food within 0.6 miles (1-kilometer) of a dialysis unit on serum phosphorus level

| Variable                          | Base Model | Base Model +  | Base Model +  | Base Model +   | Base Model +           |
|-----------------------------------|------------|---------------|---------------|----------------|------------------------|
|                                   |            | Month         | Month +       | Month +        | Month +                |
|                                   |            |               | SES Index     | SES Index +    | SES Index +            |
|                                   |            |               |               | Demographics + | Demographics +         |
|                                   |            |               |               |                | Time updated variables |
| <b>Healthy Food Outlets</b>       |            |               |               |                |                        |
| 0                                 | Ref        | Ref           | Ref           | Ref            | Ref                    |
| 1                                 | 0.0148622  | 0.01480685    | 0.00953397    | -0.00024512    | 0.0001801              |
| >=2                               | 0.01665393 | 0.01706718    | 0.01057606    | 0.00426232     | 0.00491019             |
| <b>Dialysis Month (1st)</b>       |            | Ref           | Ref           | Ref            | Ref                    |
| 2nd                               |            | -.02502594*** | -.02560477*** | -.02731088***  | -.02858528***          |
| 3rd                               |            | -.03448348*** | -.03498827*** | -.03855299***  | -.03987721***          |
| 4th                               |            | -.03956523*** | -.03914249*** | -.04233475***  | -.04415611***          |
| 5th                               |            | -.04208227*** | -.0428175***  | -.04683101***  | -.04877073***          |
| 6th                               |            | -.05894139*** | -.05896795*** | -.06374288***  | -.0657192***           |
| 7th                               |            | -.07590116*** | -.07632603*** | -.08301904***  | -.08508672***          |
| 8th                               |            | -.07562441*** | -.07571924*** | -.08321286***  | -.08533839***          |
| 9th                               |            | -.08214074*** | -.08276022*** | -.09031583***  | -.09262929***          |
| <b>SES Index Quartile</b>         |            |               |               |                |                        |
| Lowest                            |            |               | Ref           | Ref            | Ref                    |
| Medium Low                        |            |               | 0.00370916    | 0.0111676      | 0.01103975             |
| Medium High                       |            |               | -.03284652*** | -0.00088297    | -0.00145242            |
| Highest                           |            |               | -.06184137*** | .01901658*     | .01718791*             |
| <b>Patient Age in Years</b>       |            |               |               | -.02758222***  | -.02761739***          |
| <b>Sex Female</b>                 |            |               |               | -.01464688**   | -.0116684*             |
| <b>Race (White)</b>               |            |               |               | Ref            | Ref                    |
| Black                             |            |               |               | -.21827226***  | -.21765681***          |
| Hispanic                          |            |               |               | -.08218331***  | -.08554848***          |
| <b>Cause of ESRD</b>              |            |               |               |                |                        |
| Glomerulonephritis                |            |               |               | Ref            | Ref                    |
| Diabetes                          |            |               |               | .09235839***   | .09220371***           |
| Hypertension                      |            |               |               | .08545234***   | .08529812***           |
| PKD/CAKUT                         |            |               |               | .14186628***   | .13721027***           |
| Other                             |            |               |               | 0.00301957     | 0.00496629             |
| <b>Missed Dialysis Treatments</b> |            |               |               |                |                        |
| Less than 2                       |            |               |               |                | Ref                    |
| 2 to 3                            |            |               |               |                | -.04284194***          |



|                                 |           |         |           |           |  |               |
|---------------------------------|-----------|---------|-----------|-----------|--|---------------|
| >= 4                            |           |         |           |           |  | -.09702495*** |
| <b>Phosphate Binders</b>        |           |         |           |           |  |               |
| None                            |           |         |           |           |  | Ref           |
| One                             |           |         |           |           |  | .03439073***  |
| Two                             |           |         |           |           |  | .02026476***  |
| <b>Average Time on Dialysis</b> |           |         |           |           |  |               |
| <= 3hrs                         |           |         |           |           |  | Ref           |
| 3 to 3hr 30min                  |           |         |           |           |  | 0.00387938    |
| 3hr 30min to 3hr 45min          |           |         |           |           |  | -.02726724*** |
| 3hr 45min to 4hrs               |           |         |           |           |  | .03411074***  |
| >= 4hrs                         |           |         |           |           |  | -0.00381439   |
| <b>Model fit statistics</b>     |           |         |           |           |  |               |
| AIC                             | 5015322   | 5014337 | 4925085.4 | 4476654.5 |  | 4453459.6     |
| BIC                             | 5015395.7 | 5014509 | 4925294   | 4476959.1 |  | 4453861.6     |

\*p-value <0.05, \*\* p-value <0.01, \*\*\* p-value <0.001
